# Supplementary material for: A high triglyceride to high-density lipoprotein cholesterol ratio is associated with poor renal outcome in IgA nephropathy patients
Source: Research Square preprint supplement (doi:10.21203/rs.3.rs-1354712/v1), 2022-02-17
Supplement: Supplementary file 1 [file 01064dfafe423c18439a3d9a.docx]

**Supplementary table 1.** Analysis of factors associated with renal outcomes in model 1 (demographics+ pathological features +TG/HDL-C).

| Parameter | Univariate | | | | Multivariate | | |
| --- | --- | --- | --- | --- | --- | --- | --- |
| HR | 95%CI | *P* value | HR | | 95%CI | *P* value |
| high TG/HDL-C | 3.265 | 2.077-5.132 | <0.001 | 2.781 | | 1.755-4.408 | <0.001 |
| male | 1.894 | 1.208-2.970 | 0.005 | - | | - | - |
| age | 0.991 | 0.971-1.012 | 0.420 | 0.976 | | 0.954-0.999 | 0.045 |
| HTN | 3.142 | 2.011-4.910 | <0.001 | - | | - | - |
| M1 | 8.73 | 2.772-27.893 | <0.001 | 4.665 | | 1.455-14.956 | 0.010 |
| E1 | 2.224 | 1.070-4.625 | 0.032 | - | | - | - |
| S1 | 1.598 | 0.991-2.576 | 0.054 | - | | - | - |
| T1-2/T0 | 12.564 | 7.550-20.907 | <0.001 | 9.801 | | 5.851-16.417 | <0.001 |
| C1-2/C0 | 1.296 | 0.790-2.125 | 0.305 | - | | - | - |

**Abbreviations:** HTN, hypertension; M, mesangial proliferation; E, endocapillary proliferation; S, segmental sclerosis; T, tubular atrophy/interstitial fibrosis; C, crescents;
